# Supplementary material for: Trade-offs between water loss and carbon gain in a subtropical primary forest on Karst soils in China
Source: Copernicus journal article supplement (doi:10.5194/bg-2018-44), 2018-02-20
Supplement: Supplementary file 1 [file bg-2018-44-supplement.pdf]

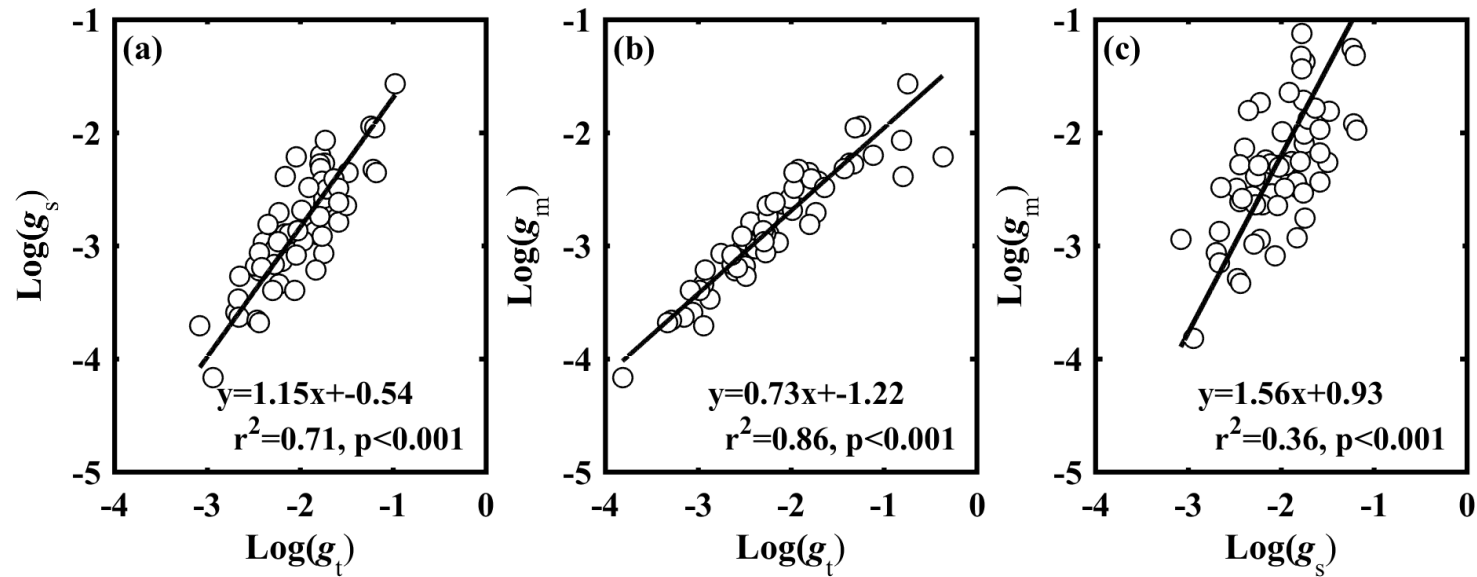

Figure S1 Log-log plots of (a) stomatal conductance to  $\text{CO}_2$  ( $g_s$ ,  $\text{mol CO}_2 \text{ m}^{-2} \text{ s}^{-1}$ ) and total conductance to  $\text{CO}_2$  ( $g_t$ ,  $\text{mol CO}_2 \text{ m}^{-2} \text{ s}^{-1}$ ); (b) mesophyll conductance to  $\text{CO}_2$  ( $g_m$ ,  $\text{mol CO}_2 \text{ m}^{-2} \text{ s}^{-1}$ ) and  $g_t$ ; and (c)  $g_s$  and  $g_m$ .

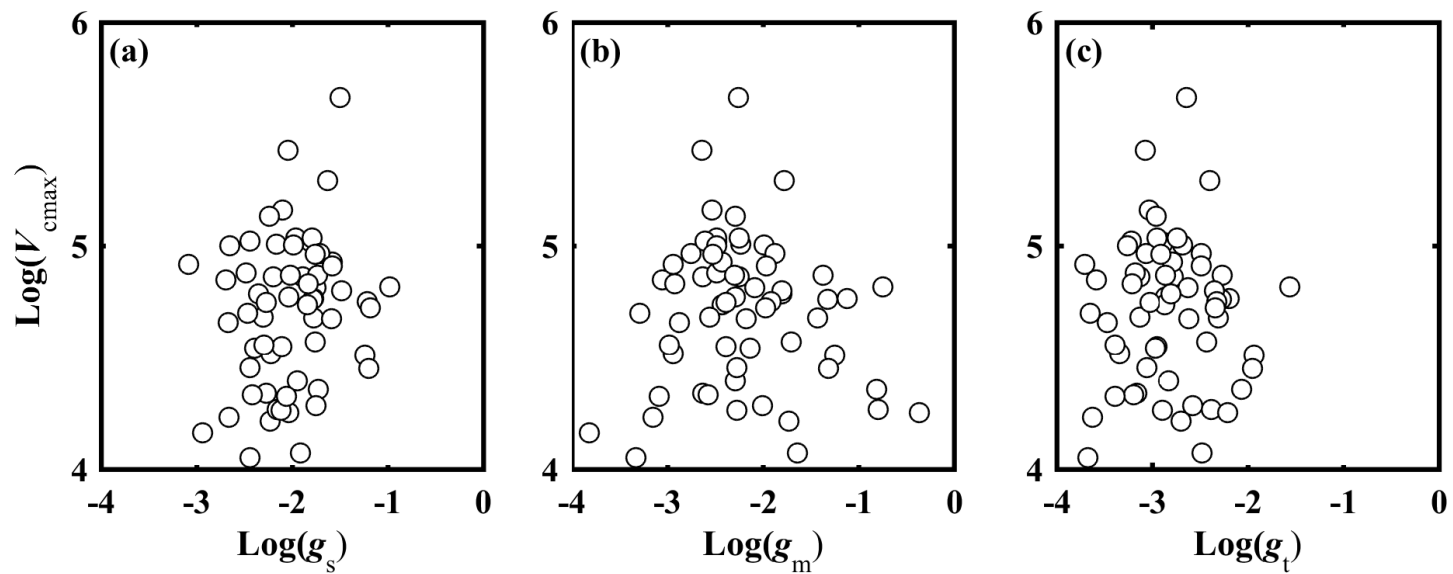

Figure S2 Log-log plots of (a) stomatal conductance to  $\text{CO}_2$  ( $g_s$ ,  $\text{mol CO}_2 \text{ m}^{-2} \text{ s}^{-1}$ ) and the maximum carboxylase activity of Rubisco ( $V_{\text{cmax}}$ ,  $\mu\text{mol CO}_2 \text{ m}^{-2} \text{ s}^{-1}$ ); (b) mesophyll conductance to  $\text{CO}_2$  ( $g_m$ ,  $\text{mol CO}_2 \text{ m}^{-2} \text{ s}^{-1}$ ) and  $V_{\text{cmax}}$ ; and (c) total conductance to  $\text{CO}_2$  ( $g_t$ ) and  $V_{\text{cmax}}$ .

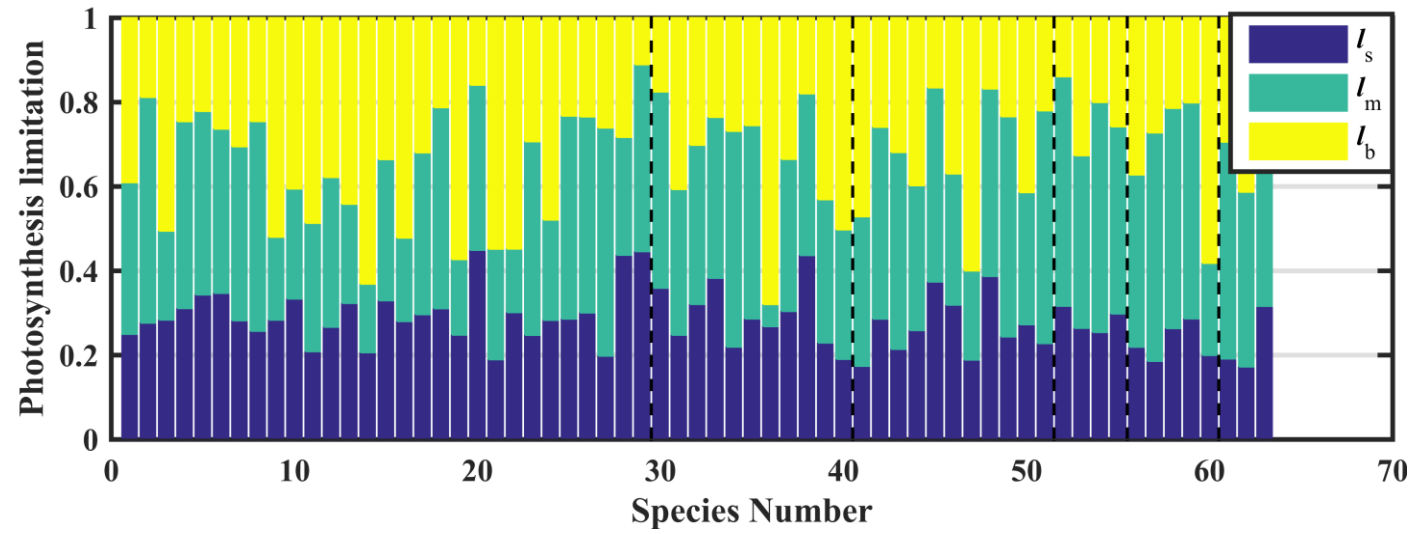

Figure S3 The limitation of (a) stomatal conductance to  $\text{CO}_2$  ( $g_s$ ) on photosynthesis rate ( $A$ ) ( $l_s$ ), (b) mesophyll conductance to  $\text{CO}_2$  ( $g_m$ ) on  $A$  ( $l_m$ ) and (c) the maximum carboxylase activity of Rubisco ( $V_{\text{cmax}}$ ) on  $A$  ( $l_b$ ).
